# Supplementary material for: LTR Retroelements and Bird Adaptation to Arid Environments
Source: MDPI journal article supplement (doi:10.3390/ijms24076332), 2023-03-28
Supplement: s1 [file s1]

# LTR retroelements and bird adaptation to arid environments.

Elisa Carotti<sup>1†</sup>, Edith Tittarelli<sup>1†</sup>, Adriana Canapa<sup>1</sup>, Maria Assunta Biscotti<sup>1</sup>, Federica Carducci<sup>1\*</sup> and Marco Barucca<sup>1</sup>.

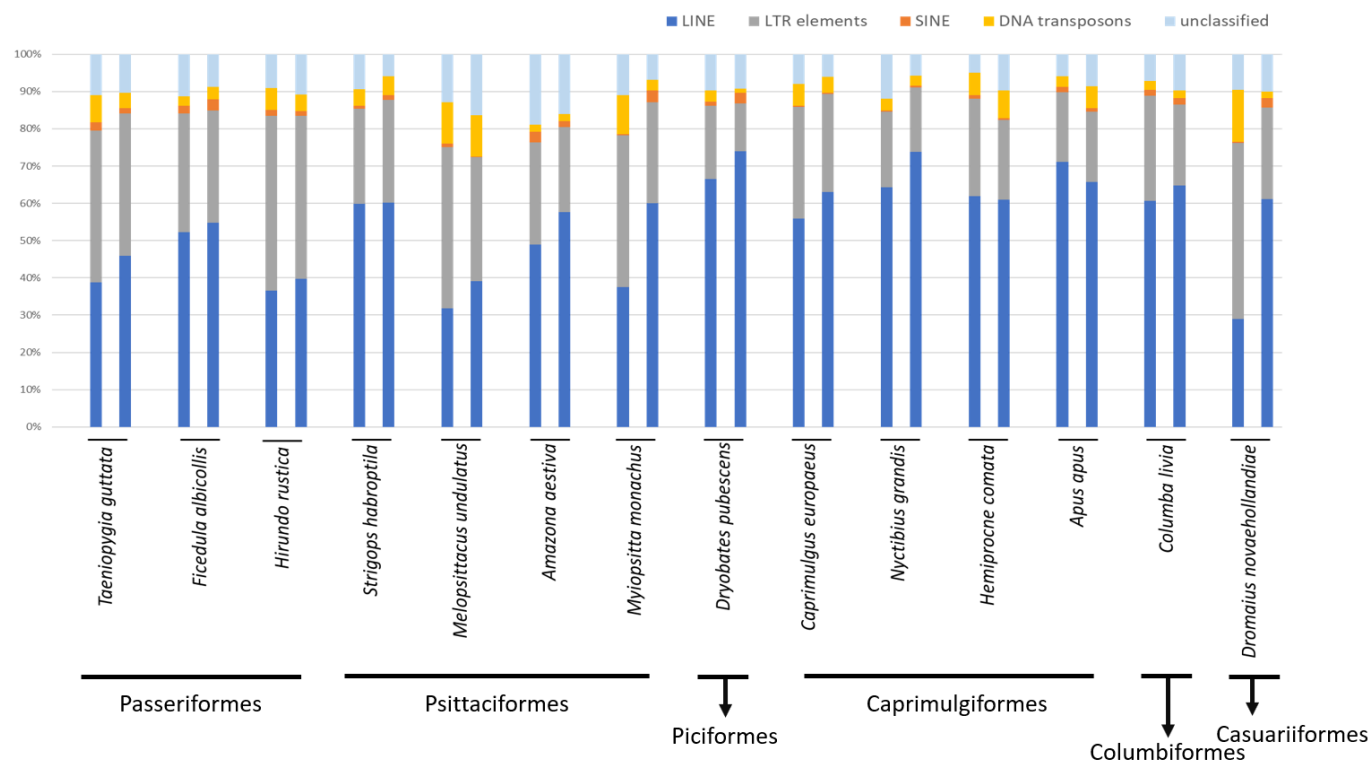

**Supplementary Figure S1.** TE relative abundance obtained analyzing 14 bird species. For each species the column on the left represents the values obtained considering chromosome level assembly while the column on the right represents the values obtained considering scaffold level assembly.

#### Sphenisciformes

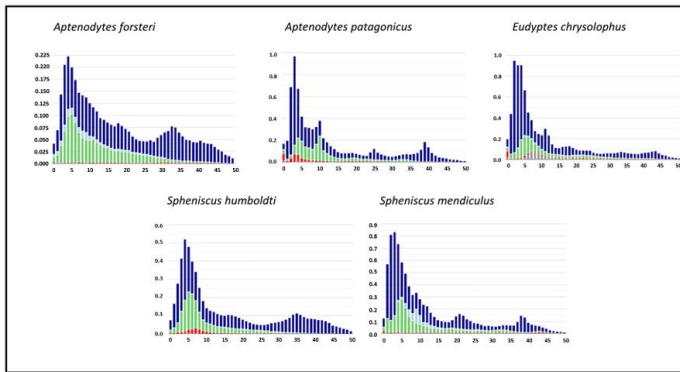

#### Caprimulgiformes

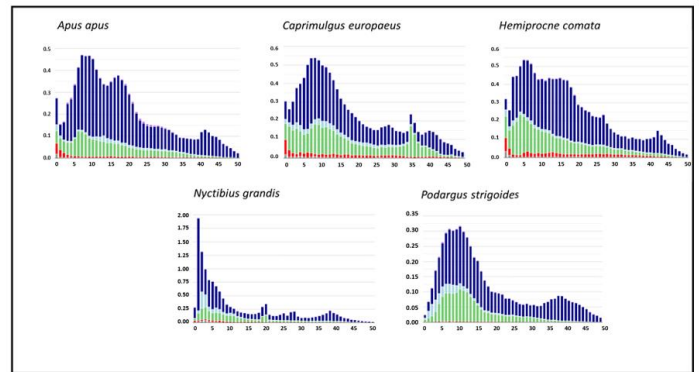

#### Galliformes

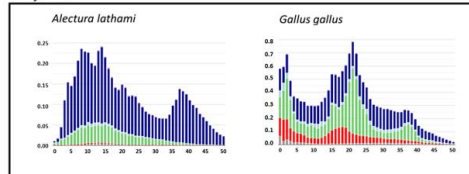

#### Columbiformes

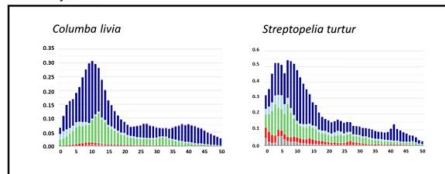

#### Piciformes

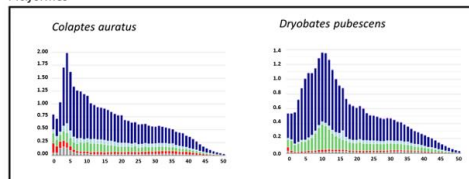

#### Charadriiformes

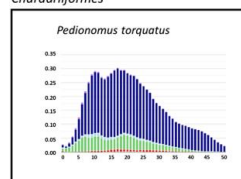

**Supplementary Figure S2.** TE landscape plots obtained by Kimura distance-based copy divergence analyses of some species belonging to Sphenisciformes, Caprimulgiformes, Galliformes, Columbiformes, Piciformes, and Charadriiformes. X axis: Kimura substitution level (CpG adjusted); Y axis: percent of genome.

**Supplementary Table S1.** Accession numbers and information regarding the assembly level of genomes belonging to bird species used in this study are reported. For each species the common name is listed in the right column.

| Assembly accession | Assembly level | Species                         | Common Name             |
|--------------------|----------------|---------------------------------|-------------------------|
| GCA_013399715.1    | Scaffold       | <i>Alectura lathamii</i>        | Australian brush-turkey |
| GCA_017639355.1    | Chromosome     | <i>Amazona aestiva</i>          | Blue-fronted amazon     |
| GCA_001420675.1    | Scaffold       |                                 |                         |
| GCF_000699145.1    | Scaffold       | <i>Aptenodytes forsteri</i>     | Emperor penguin         |
| GCA_010087175.1    | Scaffold       | <i>Aptenodytes patagonicus</i>  | King penguin            |
| GCA_020740795.1    | Chromosome     | <i>Apus apus</i>                | Common swift            |
| GCA_020740585.1    | Scaffold       |                                 |                         |
| GCA_907165065.1    | Chromosome     | <i>Caprimulgus europaeus</i>    | Eurasian nightjar       |
| GCA_907165095      | Scaffold       |                                 |                         |
| GCA_013396415.1    | Scaffold       | <i>Casuarus casuarus</i>        | Southern cassowary      |
| GCA_015227895.2    | Chromosome     | <i>Colaptes auratus</i>         | Northern flicker        |
| GCA_001887795.1    | Chromosome     | <i>Columba livia</i>            | rock pigeon             |
| GCF_000337935.1    | Scaffold       |                                 |                         |
| GCA_016128335.1    | Chromosome     | <i>Dromaius novaehollandiae</i> | Emu                     |
| GCA_013396795.1    | Scaffold       |                                 |                         |
| GCA_014839835.1    | Chromosome     | <i>Dryobates pubescens</i>      | Downy woodpecker        |
| GCF_000699005.1    | Scaffold       |                                 |                         |
| GCA_010084205.1    | Scaffold       | <i>Eudyptes chrysolophus</i>    | Macaroni penguin        |
| GCF_000247815.1    | Chromosome     | <i>Ficedula albicollis</i>      | Collared flycatcher     |
| GCF_000247815.1    | Scaffold       |                                 |                         |
| GCA_000002315.5    | Chromosome     | <i>Gallus gallus</i>            | Chicken                 |
| GCA_020745705.1    | Chromosome     | <i>Hemiprocne comata</i>        | Whiskered treeswift     |
| GCA_020745695.1    | Scaffold       |                                 |                         |
| GCA_015227805.3    | Chromosome     | <i>Hirundo rustica</i>          | Barn swallow            |
| GCA_015227815.3    | Scaffold       |                                 |                         |
| GCF_012275295.1    | Chromosome     | <i>Melopsittacus undulatus</i>  | Budgerigar              |
| GCA_012275275.1    | Scaffold       |                                 |                         |
| GCA_017639245.1    | Chromosome     | <i>Myiopsitta monachus</i>      | Monk parakeet           |

|                 |                    |                                   |                      |
|-----------------|--------------------|-----------------------------------|----------------------|
| GCA_013036005.1 | Scaffold           |                                   |                      |
| GCA_013368605.1 | Chromosome         | <i>Nyctibius grandis</i>          | Great potoo          |
| GCA_013368595.1 | Scaffold           |                                   |                      |
| GCA_001700915.1 | Chromosome         | <i>Passer domesticus</i>          | House sparrow        |
| GCA_013398155.1 | Scaffold           | <i>Pedionomus torquatus</i>       | Plains-wanderer      |
| GCA_013399755.1 | Scaffold           | <i>Podargus strigoides</i>        | Tawny frogmouth      |
| GCA_003343005.1 | Scaffold           | <i>Rhea americana</i>             | Greater rhea         |
| GCA_010076325.1 | Scaffold           | <i>Spheniscus humboldti</i>       | Humboldt's penguin   |
| GCA_010077915.1 | Scaffold           | <i>Spheniscus mendiculus</i>      | Galapagos penguin    |
| GCA_901699155.2 | Chromosome         | <i>Streptopelia turtur</i>        | European turtle-dove |
| GCF_004027225.2 | Chromosome         | <i>Strigops habroptila</i>        | Kākāpō               |
| GCA_004011185.1 | Scaffold (partial) |                                   |                      |
| GCF_000698965.1 | Scaffold           | <i>Struthio camelus australis</i> | Common ostrich       |
| GCF_003957565.2 | Chromosome         | <i>Taeniopygia guttata</i>        | Zebra finch          |
| GCA_003957525.2 | Scaffold           |                                   |                      |

**Supplementary Table S2.** Accession numbers of scaffold-level assemblies.

| Species              | Assembly accession | Assembly Level |
|----------------------|--------------------|----------------|
| <i>H. rustica</i>    | GCA_015227815.3    | scaffold       |
| <i>T. guttata</i>    | GCA_003957525.2    | scaffold       |
| <i>F. albicollis</i> | GCA_000247815.1    | scaffold       |
| <i>M. undulatus</i>  | GCA_012275275.1    | scaffold       |
| <i>S. habroptila</i> | GCA_004011185.1    | scaffold       |
| <i>A. aestiva</i>    | GCA_001420675.1    | scaffold       |
| <i>M. monachus</i>   | GCA_013036005.1    | scaffold       |
| <i>D. pubescens</i>  | GCF_000699005.1    | scaffold       |
| <i>C. livia</i>      | GCF_000337935.1    | scaffold       |
| <i>N. grandis</i>    | GCA_013368595.1    | scaffold       |
| <i>C. europaeus</i>  | GCA_907165095      | scaffold       |

|                                  |                 |          |
|----------------------------------|-----------------|----------|
| <b><i>H. comata</i></b>          | GCA_020745695.1 | scaffold |
| <b><i>A. apus</i></b>            | GCA_020740585.1 | scaffold |
| <b><i>D. novaehollandiae</i></b> | GCA_013396795.1 | scaffold |

**Supplementary Table S3.** Accession numbers of complete mitochondrial genome and positions related to 16S rDNA sequence. These sequences were used in vegan analyses. Species considered were listed and their abbreviations were reported in brackets.

| Species                           | Accession number – mitochondrial DNA 16s |
|-----------------------------------|------------------------------------------|
| <i>A. aestiva</i> (Aae)           | NC_033336.1:1106-2673                    |
| <i>A. apus</i> (Aap)              | NC_008540.1:1115-2716                    |
| <i>A. forsteri</i> (Afo)          | NC_027938.1:1119-2704                    |
| <i>A. lathamii</i> (Ala)          | MW574353.1:2248-3860                     |
| <i>A. patagonicus</i> (Apa)       | NC_045377.1:1140-2692                    |
| <i>C. casuarius</i> (Cca)         | MN356153.1:1107-2701                     |
| <i>C. auratus</i> (Cau)           | JAAWVA010000182.1:20328-21925            |
| <i>C. livia</i> (Cli)             | GU908131.1:1115-2700                     |
| <i>D. novaehollandiae</i> (Dno)   | NC_002784.1:1108-2703                    |
| <i>D. pubescens</i> (Dpu)         | MN356145.1:1114-2707                     |
| <i>E. crhyolophus</i> (Ecr)       | MW074963.1:1117-2707                     |
| <i>F. albicollis</i> (Fal)        | NC_021621.1:1120-2715                    |
| <i>G. gallus</i> (Gga)            | KX987152.1:2351-3972                     |
| <i>H. comata</i> (Hco)            | MN356189.1:1116-2705                     |
| <i>H. rustica</i> (Hru)           | MN356225.1:1112-2719                     |
| <i>M. monachus</i> (Mmo)          | NC_027844.1:2364-3942                    |
| <i>M. undulatus</i> (Mun)         | EF450826.1:1117-2688                     |
| <i>N. grandis</i> (Ngr)           | MN356216.1:1121-2718                     |
| <i>P. domesticus</i> (Pdo)        | MN356394.1:1116-2715                     |
| <i>P. strigoides</i> (Pst)        | MW883530.1:1100-2713                     |
| <i>P. torquatus</i> (Pto)         | MN356368.1:1113-2696                     |
| <i>R. americana</i> (Ram)         | Y16884.3:1103-2685                       |
| <i>S. camelus australis</i> (Sca) | NC_002785.1:1104-2683                    |
| <i>S. habroptila</i> (Sha)        | MZ128785.1:1085-2674                     |
| <i>S. humboldti</i> (Shu)         | MK760995.1:1145-2705                     |
| <i>S. mendiculus</i> (Sme)        | MK760994.1:1145-2704                     |
| <i>S. turtur</i> (Stu)            | CABFKC020000024.1:41166-42762            |
| <i>T. guttata</i> (Tgu)           | DQ453515.1:1120-2713                     |

**Supplementary Table S4.** P-distance matrix performed on 16S rDNA sequences of species considered in the present study, exception made for *Caprimulgus europaeus* (please see material and methods for further details). Abbreviations used for species names were explained in Supplementary Table S3.

|     | Hru  | Pdo  | Tgu  | Fal  | Sha  | Aae  | Mmo  | Mun  | Dpu  | Cau  | Afo  | Apa  | Shu  | Sme  | Ech  | Hco  | Aap  | Pto  | Ngr  | Cli  | Stu  | Dno  | Cca  | Sca  | Ram  | Pst  | Ala | Gga |
|-----|------|------|------|------|------|------|------|------|------|------|------|------|------|------|------|------|------|------|------|------|------|------|------|------|------|------|-----|-----|
| Hru |      |      |      |      |      |      |      |      |      |      |      |      |      |      |      |      |      |      |      |      |      |      |      |      |      |      |     |     |
| Pdo | 0.10 |      |      |      |      |      |      |      |      |      |      |      |      |      |      |      |      |      |      |      |      |      |      |      |      |      |     |     |
| Tgu | 0.10 | 0.06 |      |      |      |      |      |      |      |      |      |      |      |      |      |      |      |      |      |      |      |      |      |      |      |      |     |     |
| Fal | 0.10 | 0.08 | 0.08 |      |      |      |      |      |      |      |      |      |      |      |      |      |      |      |      |      |      |      |      |      |      |      |     |     |
| Sha | 0.20 | 0.20 | 0.19 | 0.20 |      |      |      |      |      |      |      |      |      |      |      |      |      |      |      |      |      |      |      |      |      |      |     |     |
| Aae | 0.22 | 0.22 | 0.21 | 0.21 | 0.15 |      |      |      |      |      |      |      |      |      |      |      |      |      |      |      |      |      |      |      |      |      |     |     |
| Mmo | 0.21 | 0.20 | 0.20 | 0.19 | 0.13 | 0.12 |      |      |      |      |      |      |      |      |      |      |      |      |      |      |      |      |      |      |      |      |     |     |
| Mun | 0.21 | 0.21 | 0.20 | 0.20 | 0.15 | 0.14 | 0.13 |      |      |      |      |      |      |      |      |      |      |      |      |      |      |      |      |      |      |      |     |     |
| Dpu | 0.21 | 0.20 | 0.21 | 0.20 | 0.20 | 0.20 | 0.20 | 0.19 |      |      |      |      |      |      |      |      |      |      |      |      |      |      |      |      |      |      |     |     |
| Cau | 0.21 | 0.20 | 0.20 | 0.21 | 0.20 | 0.21 | 0.21 | 0.21 | 0.13 |      |      |      |      |      |      |      |      |      |      |      |      |      |      |      |      |      |     |     |
| Afo | 0.18 | 0.17 | 0.18 | 0.18 | 0.18 | 0.20 | 0.18 | 0.18 | 0.18 | 0.18 |      |      |      |      |      |      |      |      |      |      |      |      |      |      |      |      |     |     |
| Apa | 0.18 | 0.17 | 0.18 | 0.18 | 0.18 | 0.20 | 0.18 | 0.17 | 0.18 | 0.17 | 0.02 |      |      |      |      |      |      |      |      |      |      |      |      |      |      |      |     |     |
| Shu | 0.18 | 0.17 | 0.18 | 0.17 | 0.17 | 0.20 | 0.17 | 0.17 | 0.17 | 0.18 | 0.08 | 0.08 |      |      |      |      |      |      |      |      |      |      |      |      |      |      |     |     |
| Sme | 0.18 | 0.17 | 0.18 | 0.18 | 0.17 | 0.20 | 0.17 | 0.17 | 0.17 | 0.18 | 0.08 | 0.08 | 0.00 |      |      |      |      |      |      |      |      |      |      |      |      |      |     |     |
| Ech | 0.18 | 0.17 | 0.17 | 0.17 | 0.18 | 0.20 | 0.18 | 0.17 | 0.17 | 0.17 | 0.08 | 0.08 | 0.06 | 0.06 |      |      |      |      |      |      |      |      |      |      |      |      |     |     |
| Hco | 0.17 | 0.17 | 0.17 | 0.17 | 0.17 | 0.20 | 0.18 | 0.18 | 0.18 | 0.18 | 0.15 | 0.16 | 0.15 | 0.15 | 0.15 |      |      |      |      |      |      |      |      |      |      |      |     |     |
| Aap | 0.18 | 0.19 | 0.18 | 0.18 | 0.17 | 0.19 | 0.17 | 0.18 | 0.17 | 0.18 | 0.14 | 0.15 | 0.13 | 0.13 | 0.15 | 0.12 |      |      |      |      |      |      |      |      |      |      |     |     |
| Pto | 0.19 | 0.19 | 0.19 | 0.19 | 0.19 | 0.20 | 0.19 | 0.18 | 0.19 | 0.19 | 0.16 | 0.15 | 0.16 | 0.16 | 0.15 | 0.16 | 0.17 |      |      |      |      |      |      |      |      |      |     |     |
| Ngr | 0.21 | 0.20 | 0.20 | 0.19 | 0.18 | 0.21 | 0.19 | 0.19 | 0.19 | 0.20 | 0.17 | 0.17 | 0.16 | 0.16 | 0.16 | 0.16 | 0.17 | 0.18 |      |      |      |      |      |      |      |      |     |     |
| Cli | 0.19 | 0.19 | 0.18 | 0.19 | 0.19 | 0.19 | 0.19 | 0.19 | 0.19 | 0.20 | 0.16 | 0.16 | 0.16 | 0.16 | 0.16 | 0.16 | 0.17 | 0.17 | 0.17 | 0.18 |      |      |      |      |      |      |     |     |
| Stu | 0.19 | 0.18 | 0.18 | 0.18 | 0.19 | 0.20 | 0.20 | 0.19 | 0.18 | 0.20 | 0.17 | 0.16 | 0.16 | 0.16 | 0.16 | 0.16 | 0.17 | 0.17 | 0.17 | 0.18 | 0.08 |      |      |      |      |      |     |     |
| Dno | 0.20 | 0.19 | 0.18 | 0.19 | 0.20 | 0.20 | 0.20 | 0.20 | 0.20 | 0.20 | 0.18 | 0.17 | 0.17 | 0.17 | 0.16 | 0.19 | 0.19 | 0.18 | 0.20 | 0.18 | 0.19 |      |      |      |      |      |     |     |
| Cca | 0.20 | 0.20 | 0.19 | 0.19 | 0.20 | 0.21 | 0.20 | 0.20 | 0.20 | 0.21 | 0.16 | 0.15 | 0.16 | 0.16 | 0.15 | 0.19 | 0.19 | 0.17 | 0.19 | 0.18 | 0.19 | 0.09 |      |      |      |      |     |     |
| Sca | 0.20 | 0.20 | 0.19 | 0.20 | 0.19 | 0.21 | 0.20 | 0.19 | 0.20 | 0.20 | 0.16 | 0.15 | 0.14 | 0.15 | 0.15 | 0.19 | 0.18 | 0.17 | 0.18 | 0.19 | 0.19 | 0.13 | 0.13 |      |      |      |     |     |
| Ram | 0.18 | 0.19 | 0.18 | 0.18 | 0.20 | 0.21 | 0.20 | 0.19 | 0.19 | 0.20 | 0.17 | 0.17 | 0.17 | 0.17 | 0.17 | 0.18 | 0.17 | 0.18 | 0.19 | 0.20 | 0.19 | 0.14 | 0.14 | 0.14 |      |      |     |     |
| Pst | 0.22 | 0.21 | 0.22 | 0.22 | 0.21 | 0.21 | 0.21 | 0.21 | 0.18 | 0.20 | 0.18 | 0.18 | 0.19 | 0.19 | 0.19 | 0.19 | 0.18 | 0.19 | 0.20 | 0.19 | 0.20 | 0.20 | 0.21 | 0.21 |      |      |     |     |
| Ala | 0.21 | 0.21 | 0.21 | 0.20 | 0.20 | 0.20 | 0.20 | 0.19 | 0.20 | 0.20 | 0.18 | 0.18 | 0.18 | 0.18 | 0.17 | 0.19 | 0.18 | 0.19 | 0.20 | 0.21 | 0.20 | 0.19 | 0.19 | 0.18 | 0.19 | 0.22 |     |     |
| Gga | 0.21 | 0.20 | 0.21 | 0.20 | 0.22 | 0.22 | 0.22 | 0.21 | 0.22 | 0.21 | 0.19 | 0.18 | 0.19 | 0.19 | 0.18 | 0.20 | 0.19 | 0.19 | 0.21 | 0.20 | 0.20 | 0.20 | 0.19 | 0.21 | 0.22 | 0.18 |     |     |
